# Supplementary material for: Application of massive parallel sequencing to whole genome SNP discovery in the porcine genome
Source: PubMed Central journal article supplement (PMC2739861; doi:10.1186/1471-2164-10-374), 2009-08-12

Supplemental Figure 1 - Average quality score per position on the sequence. Results are shown for several runs: Run 1 (red bars, 463,012 sequences), Run 2 (green bars, 14,827,185 sequences) and Run 3 (blue bars, 55,057,867 sequences). Sequences were trimmed at 35 bp.

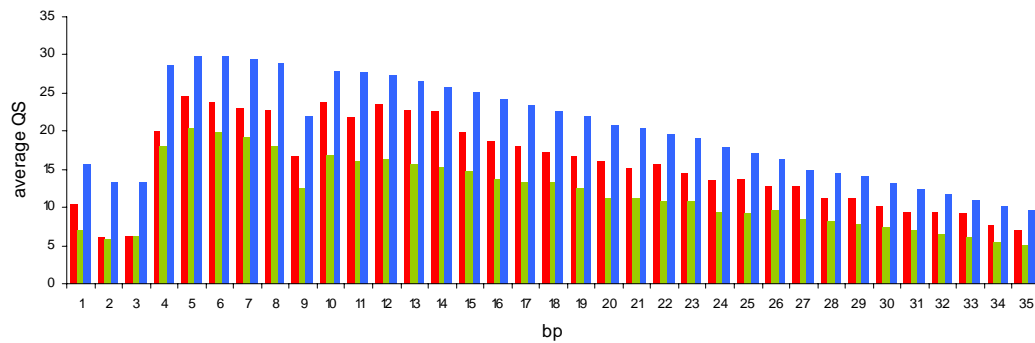

Supplemental Figure 2- Distribution of minor allele frequency for data sets: Data12, Data 15 and Data 20.

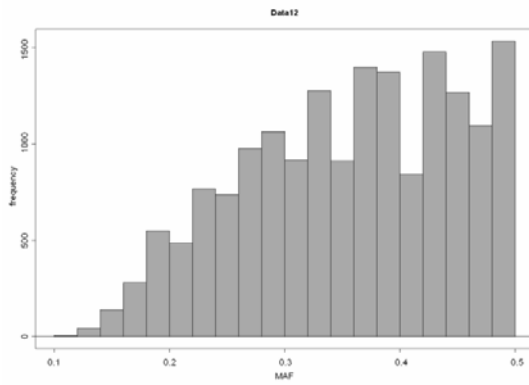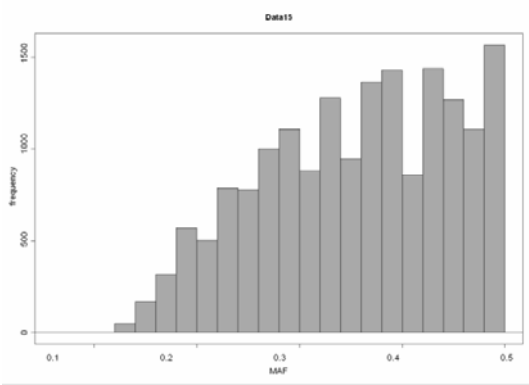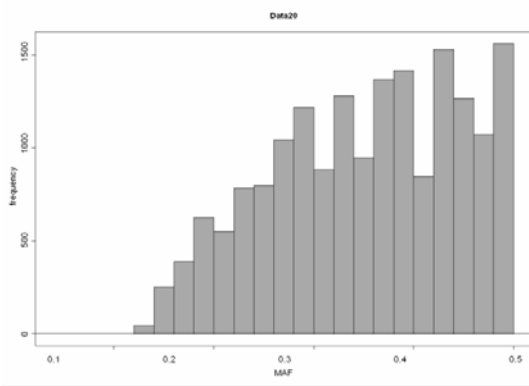

Supplemental Figure 3 - Nucleotide diversity along remaining porcine chromosomes. Each bar represents a window of 1Mb over the chromosome. Red bars indicate chromosome window containing the centromere.

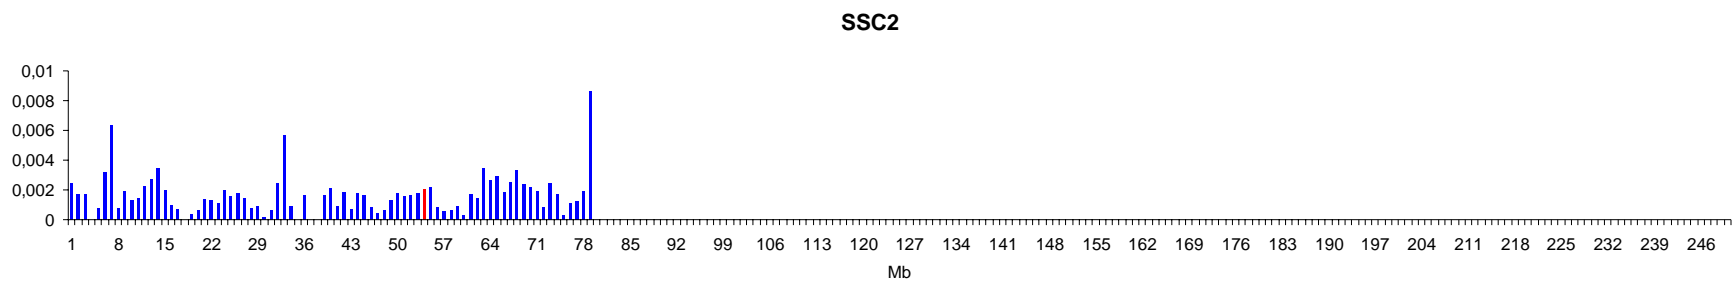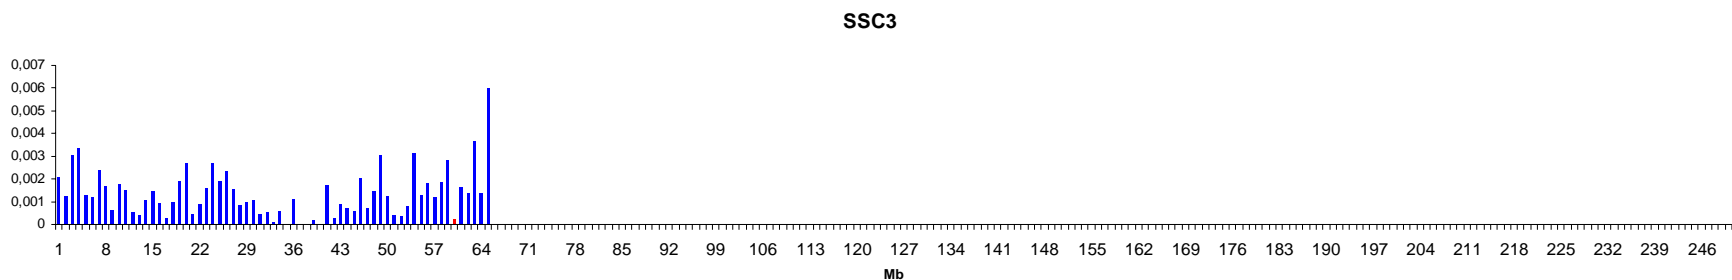

### SSC4

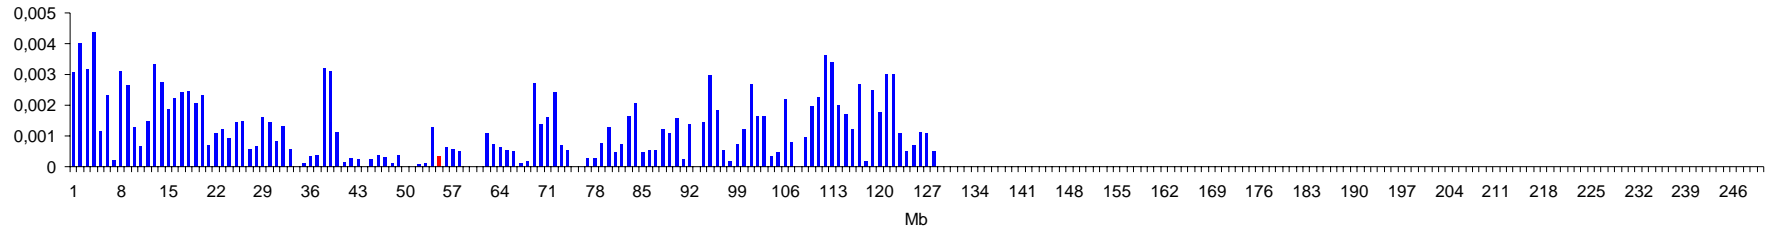

### SSC5

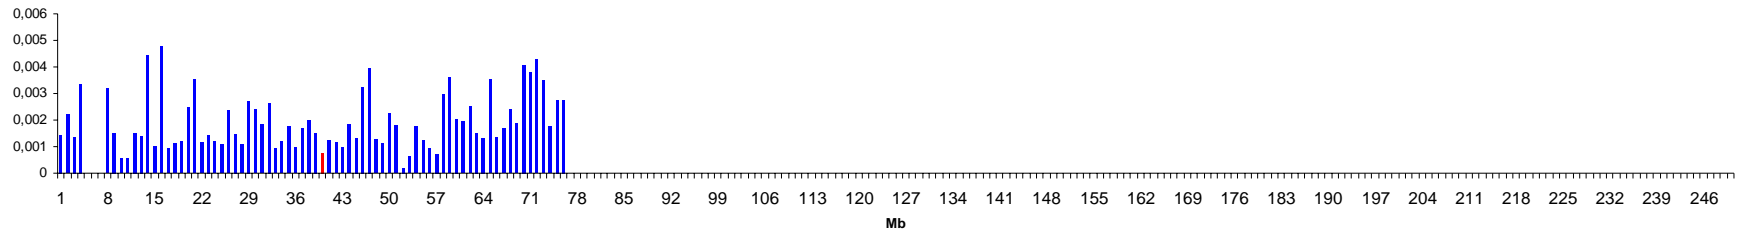

### SSC6

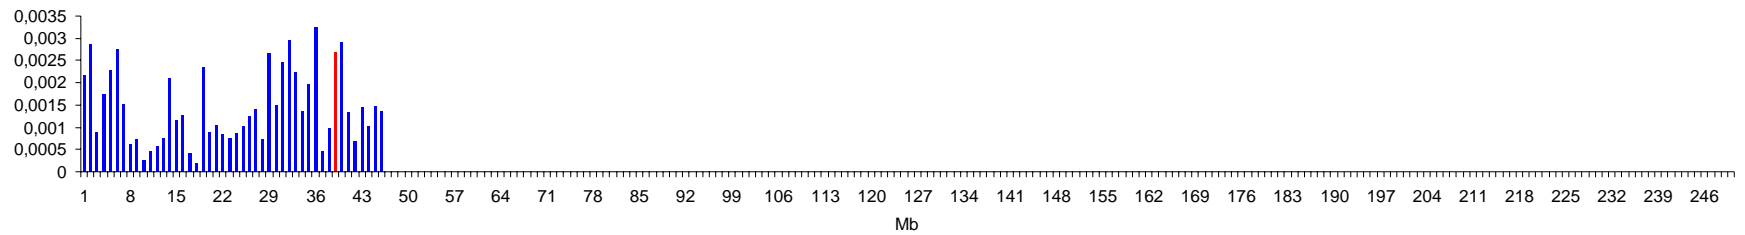

**SSC7**

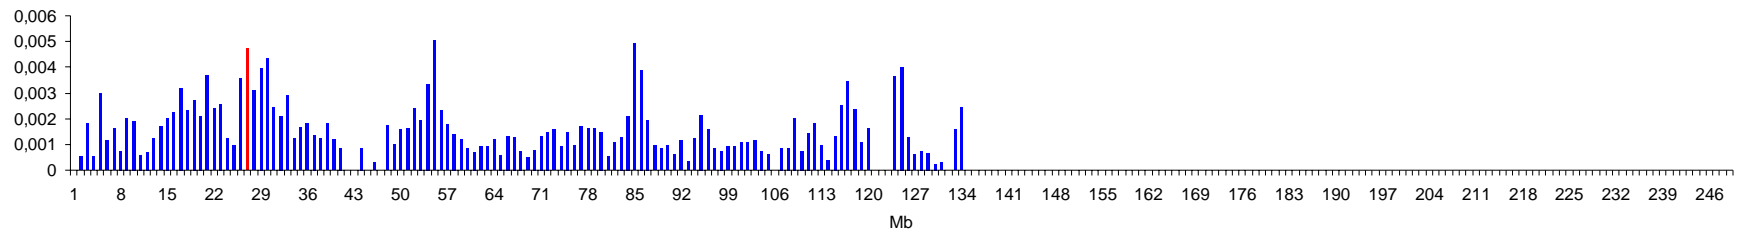

**SSC8**

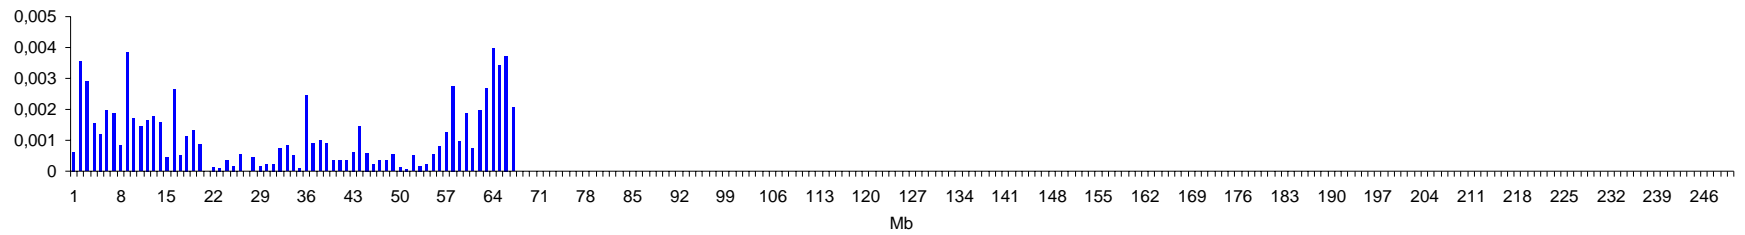

**SSC9**

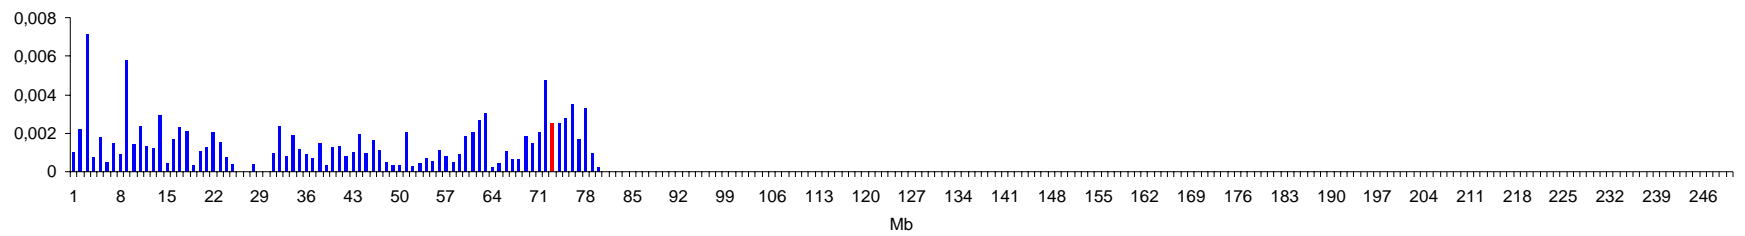

### SSC10

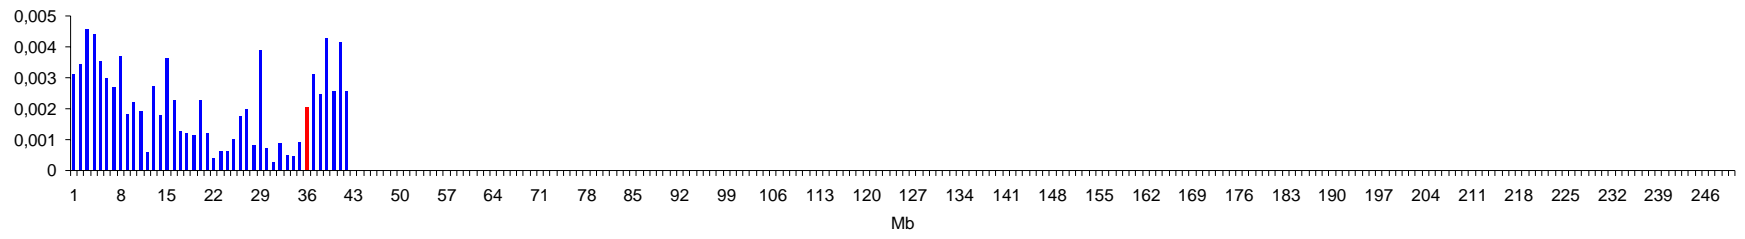

### SSC11

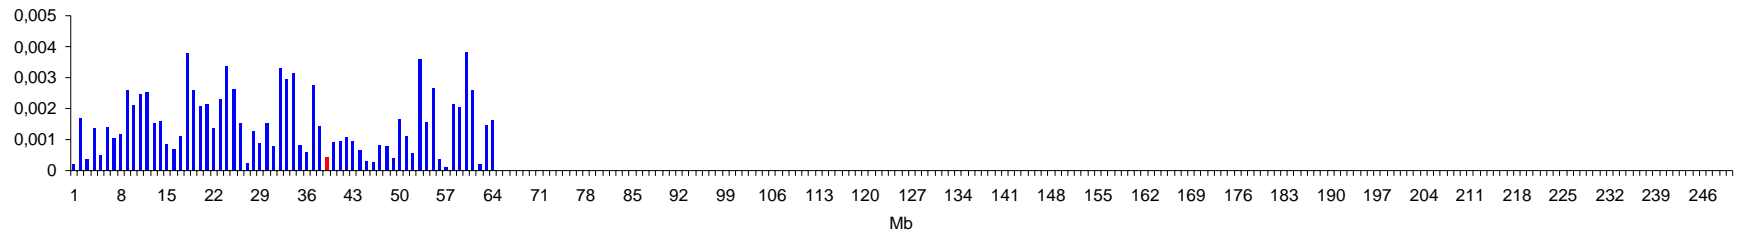

### SSC12

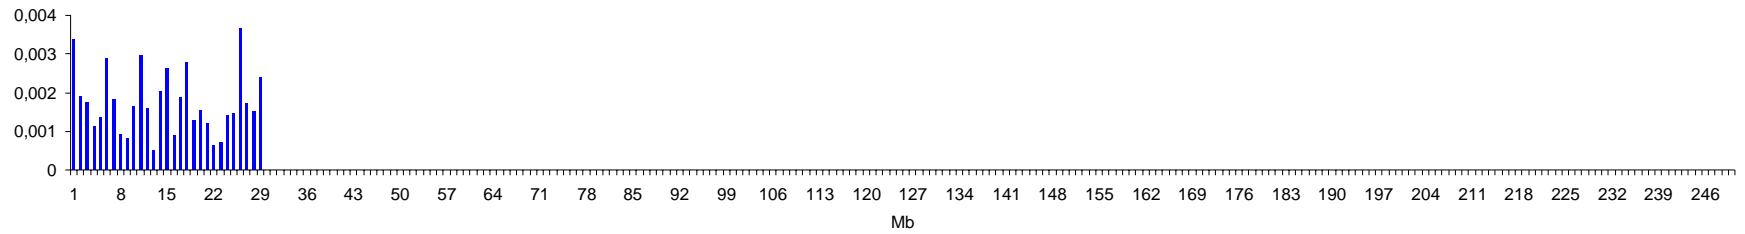

### SSC13

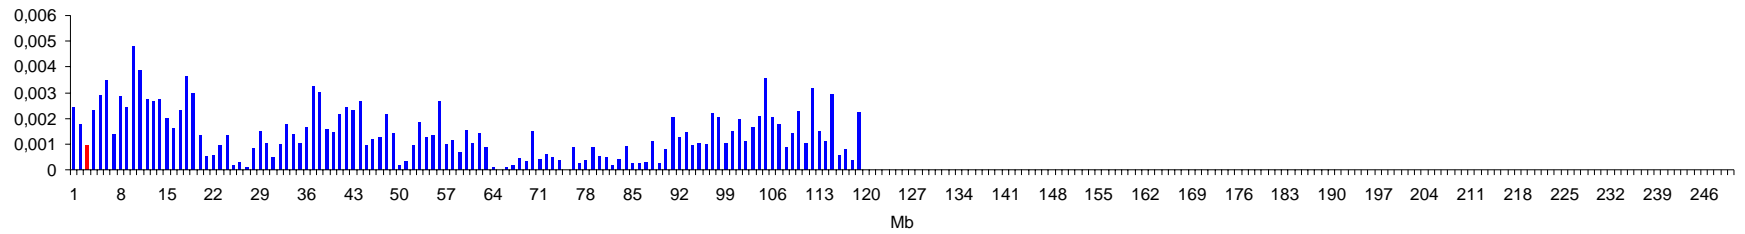

### SSC14

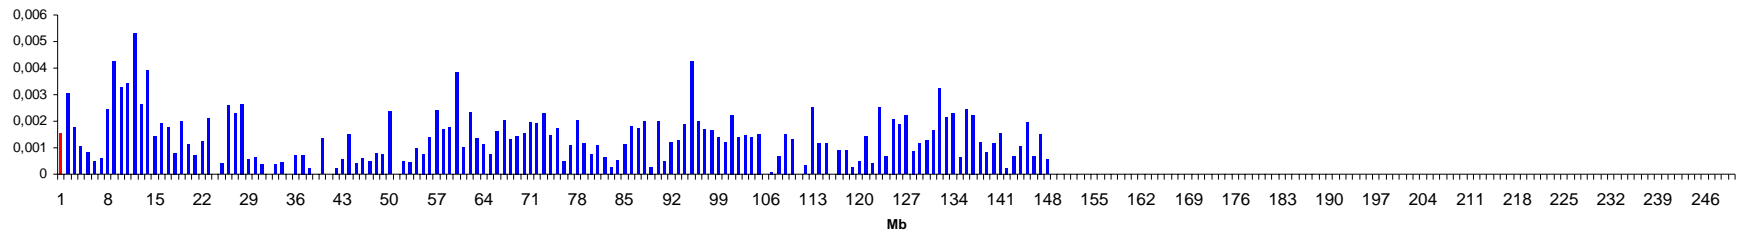

**SSC15**

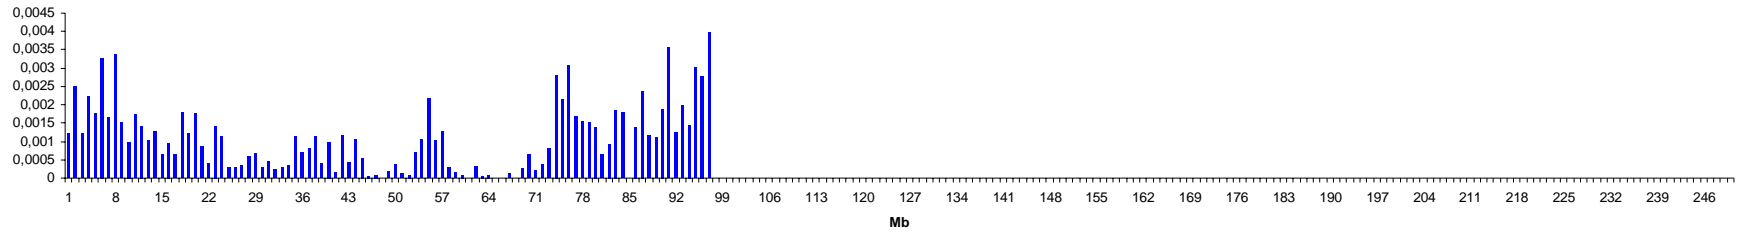

**SSC16**

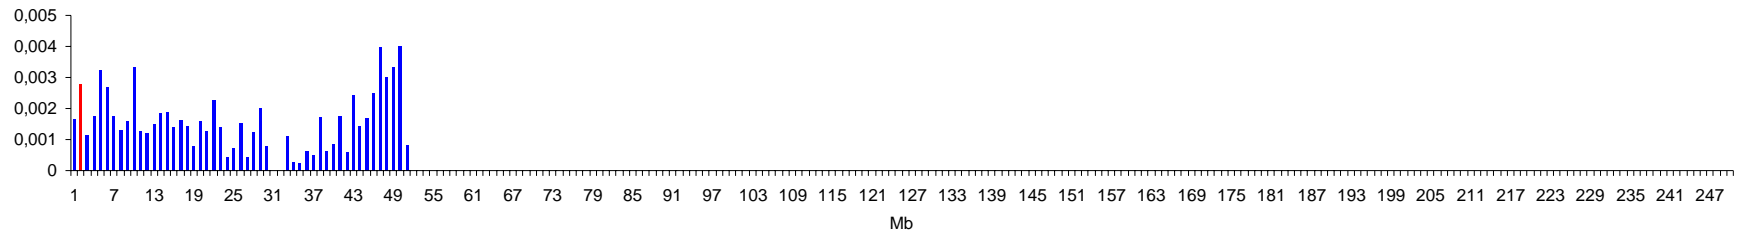

**SSC17**

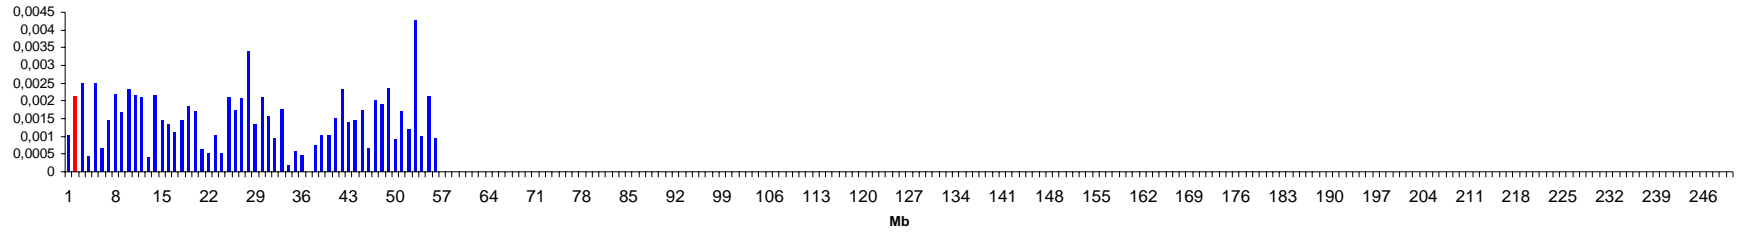



### SSC18

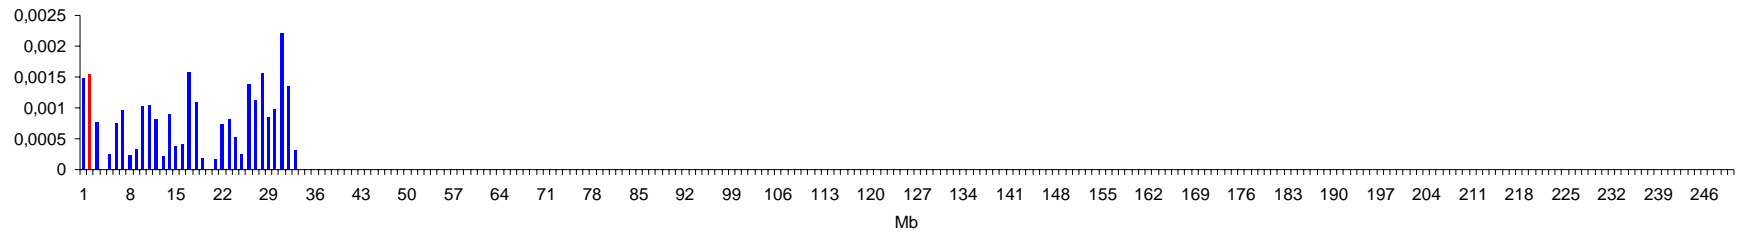

### SSCX

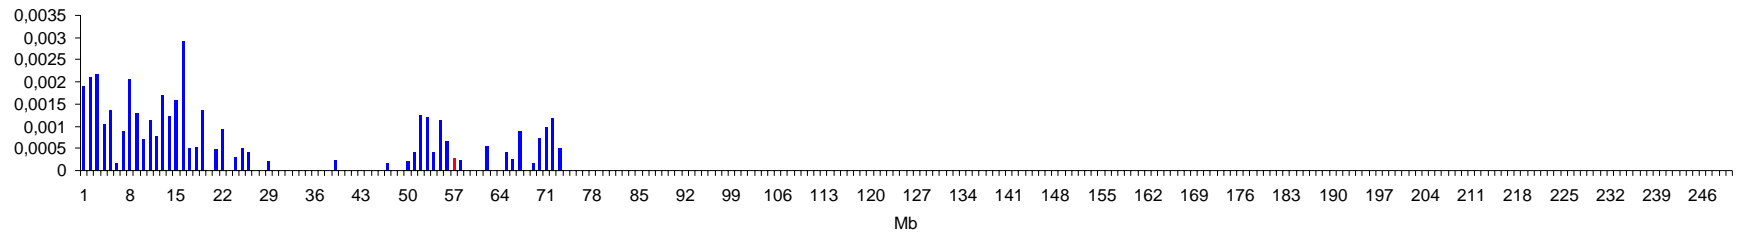

Supplement: 1471-2164-10-374-S1.pdf [file 1471-2164-10-374-S1.pdf]
